# Supplementary material for: Evaluation of Changes in Metabolites of Saliva in Canine Obesity Using a Targeted Metabolomic Approach
Source: MDPI journal article supplement (doi:10.3390/ani11092501), 2021-08-26
Supplement: s1 [file s1]

Supplementary Table S1. Individual characteristics of dogs included in the targeted metabolomics study.

| Group   | Dog | Gender | Breed  | Age<br>(years) | BCS (1-5) | BF (%) |
|---------|-----|--------|--------|----------------|-----------|--------|
| Obese   | 1   | Male   | Beagle | 5              | 5         | 40.35  |
|         | 2   | Male   | Beagle | 6              | 5         | 33.04  |
|         | 3   | Male   | Beagle | 9              | 5         | 60     |
|         | 4   | Male   | Beagle | 5              | 5         | 42.15  |
|         | 5   | Male   | Beagle | 6              | 4.5       | 47.60  |
|         | 6   | Male   | Beagle | 4              | 4.5       | 39.70  |
|         | 7   | Male   | Beagle | 6              | 4         | 33.16  |
|         | 8   | Male   | Beagle | 7              | 4         | 43.03  |
|         | 9   | Male   | Beagle | 5              | 4         | 45.19  |
|         | 10  | Male   | Beagle | 4              | 4         | 37.11  |
| Control | 1   | Male   | Beagle | 5              | 3         | 14.51  |
|         | 2   | Male   | Beagle | 4              | 3         | 17.13  |
|         | 3   | Male   | Beagle | 6              | 3.5       | 20.10  |
|         | 4   | Male   | Beagle | 5              | 3         | 12.45  |
|         | 5   | Male   | Beagle | 6              | 3         | 11.5   |
|         | 6   | Male   | Beagle | 6              | 3         | 7.5    |
|         | 7   | Male   | Beagle | 6              | 3         | 14.51  |
|         | 8   | Male   | Beagle | 5              | 3.5       | 17.3   |
|         | 9   | Male   | Beagle | 4              | 3         | 9.18   |
