# Supplementary material for: Evaluation of Changes in Metabolites of Saliva in Canine Obesity Using a Targeted Metabolomic Approach
Source: Animals (Basel). 2021 Aug 26;11(9):2501. doi: 10.3390/ani11092501 (PMC8472812; doi:10.3390/ani11092501)
Supplement: Supplementary file 1 [file animals-11-02501-s001.zip › Supplementary Table S2.xlsx]

## Sheet: Hoja1
Table S2. Pathways enriched by significant metabolites in canine obesity.
	total	expected	hits	Raw p	Holm p	FDR
Ammonia Recycling	32	0.406	3	0.00641	0.629	0.611
Alanine Metabolism	17	0.216	2	0.0182	1	0.611
Glutathione Metabolism	21	0.267	2	0.0273	1	0.611
Carnitine Synthesis	22	0.279	2	0.0298	1	0.611
Glycine and Serine Metabolism	59	0.749	3	0.0344	1	0.611
Selenoamino Acid Metabolism	28	0.355	2	0.0467	1	0.611
Urea Cycle	29	0.368	2	0.0498	1	0.611
Methylhistidine Metabolism	4	0.0508	1	0.0499	1	0.611
Biotin Metabolism	8	0.102	1	0.0975	1	0.971
Methionine Metabolism	43	0.546	2	0.1	1	0.971
Homocysteine Degradation	9	0.114	1	0.109	1	0.971
Glutamate Metabolism	49	0.622	2	0.125	1	1
Arginine and Proline Metabolism	53	0.673	2	0.142	1	1
Phosphatidylethanolamine Biosynthesis	12	0.152	1	0.143	1	1
Glucose-Alanine Cycle	13	0.165	1	0.154	1	1
Lysine Degradation	30	0.381	1	0.322	1	1
Beta-Alanine Metabolism	34	0.432	1	0.357	1	1
Aspartate Metabolism	35	0.444	1	0.365	1	1
Porphyrin Metabolism	40	0.508	1	0.406	1	1
Sphingolipid Metabolism	40	0.508	1	0.406	1	1
Histidine Metabolism	43	0.546	1	0.429	1	1
Tryptophan Metabolism	60	0.762	1	0.546	1	1
Bile Acid Biosynthesis	65	0.825	1	0.576	1	1
Purine Metabolism	74	0.939	1	0.625	1	1
